# Supplementary material for: Transcriptome-based drug repositioning identifies TPCA-1 as a potential selective inhibitor of esophagus squamous carcinoma cell viability
Source: PubMed Central journal article supplement — Int J Mol Med. 2022 Apr 8;49(6):75. doi: 10.3892/ijmm.2022.5131 (PMC9015666; doi:10.3892/ijmm.2022.5131), 2022-04-08

Figure S2. Effects of TPCA-1, a potent inhibitor of IKK $\beta$  protein, on the growth of KYSE-450 or Het-1A cells. \*P<0.05, \*\*\*P<0.001; ns, no significance. TPCA-1, 2-[(aminocarbonyl) amino]-5-(4-fluorophenyl)-3-thiophenecarboxamide; OD490, optical density at 490 nm.

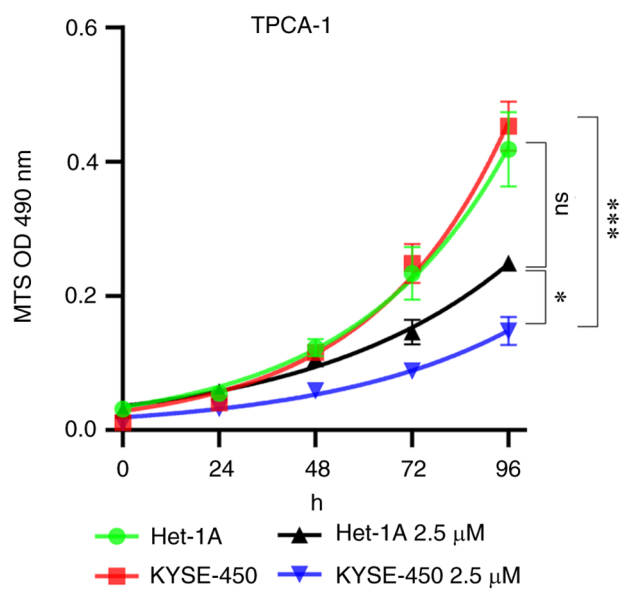

Supplement: Supplementary_Data1.pdf [file Supplementary_Data1.pdf]
